# Supplementary material
Source: PubMed Central journal article supplement (PMC6031304)
Supplement: NIHMS77720-supplement-Table_S2.pdf [file NIHMS77720-supplement-Table_S2.pdf]

**Table S2.** Number of subjects and regions of origin of tau-mutated and reference families

| Tau-mutated families |                |            |           |           |                     | Reference families |       |           |
|----------------------|----------------|------------|-----------|-----------|---------------------|--------------------|-------|-----------|
| Family               | Italian Region | Total      | Dementia  | Cancer    | Dementia and cancer | Family             | Total | Cancer    |
| 1                    | Veneto         | 10         | 4         | 3         | 1                   | 1                  | 9     | 1         |
|                      |                |            |           |           |                     | 2                  | 12    | 3         |
|                      |                |            |           |           |                     | 3                  | 11    | 2         |
| 2                    | Sicilia        | 9          | 3         | 2         | 1                   | 1                  | 25    | 1         |
|                      |                |            |           |           |                     | 2                  | 19    | 4         |
|                      |                |            |           |           |                     | 3                  | 9     | 1         |
| 3                    | Veneto         | 4          | 2         | 0         | 1                   | 1                  | 28    | 3         |
|                      |                |            |           |           |                     | 2                  | 21    | 0         |
|                      |                |            |           |           |                     | 3                  | 18    | 4         |
| 4                    | Sicilia        | 16         | 8         | 1         | 2                   | 1                  | 18    | 1         |
|                      |                |            |           |           |                     | 2                  | 16    | 0         |
|                      |                |            |           |           |                     | 3                  | 18    | 2         |
| 5                    | Calabria       | 11         | 3         | 2         | 0                   | 1                  | 21    | 3         |
|                      |                |            |           |           |                     | 2                  | 18    | 2         |
|                      |                |            |           |           |                     | 3                  | 16    | 2         |
| 6                    | Puglia         | 8          | 2         | 1         | 1                   | 1                  | 15    | 1         |
|                      |                |            |           |           |                     | 2                  | 11    | 3         |
|                      |                |            |           |           |                     | 3                  | 15    | 2         |
| 7                    | Puglia         | 11         | 6         | 0         | 1                   | 1                  | 10    | 0         |
|                      |                |            |           |           |                     | 2                  | 9     | 1         |
|                      |                |            |           |           |                     | 3                  | 15    | 2         |
| 8                    | Campania       | 18         | 10        | 0         | 0                   | 1                  | 14    | 1         |
|                      |                |            |           |           |                     | 2                  | 12    | 0         |
|                      |                |            |           |           |                     | 3                  | 15    | 2         |
| 9                    | Lombardia      | 13         | 5         | 3         | 0                   | 1                  | 25    | 1         |
|                      |                |            |           |           |                     | 2                  | 11    | 0         |
|                      |                |            |           |           |                     | 3                  | 19    | 3         |
| 10                   | Calabria       | 13         | 3         | 3         | 1                   | 1                  | 16    | 1         |
|                      |                |            |           |           |                     | 2                  | 23    | 1         |
|                      |                |            |           |           |                     | 3                  | 21    | 1         |
| 11                   | Calabria       | 9          | 3         | 0         | 0                   | 1                  | 18    | 3         |
|                      |                |            |           |           |                     | 2                  | 21    | 0         |
|                      |                |            |           |           |                     | 3                  | 21    | 0         |
| 12                   | Campania       | 12         | 4         | 1         | 0                   | 1                  | 11    | 0         |
|                      |                |            |           |           |                     | 2                  | 16    | 2         |
|                      |                |            |           |           |                     | 3                  | 13    | 2         |
| 13                   | Calabria       | 12         | 6         | 0         | 0                   | 1                  | 13    | 2         |
|                      |                |            |           |           |                     | 2                  | 16    | 2         |
|                      |                |            |           |           |                     | 3                  | 14    | 2         |
| 14                   | Sicilia        | 4          | 2         | 1         | 0                   | 1                  | 13    | 1         |
|                      |                |            |           |           |                     | 2                  | 8     | 2         |
|                      |                |            |           |           |                     | 3                  | 16    | 1         |
| 15                   | Piemonte       | 14         | 7         | 1         | 0                   | 1                  | 17    | 0         |
|                      |                |            |           |           |                     | 2                  | 15    | 2         |
|                      |                |            |           |           |                     | 3                  | 15    | 1         |
|                      |                | <b>164</b> | <b>68</b> | <b>18</b> | <b>8</b>            | <b>717</b>         |       | <b>68</b> |
